# Supplementary material for: Modelling the habitat preference of two key Sphagnum species in a poor fen as controlled by capitulum water content
Source: Copernicus journal article supplement (doi:10.5194/bg-17-5693-2020), 2020-11-23
Supplement: Supplementary file 1 [file bg-17-5693-2020-supplement.zip]

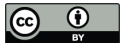

## *Supplement of*

# **Modelling the habitat preference of two key *Sphagnum* species in a poor fen as controlled by capitulum water content**

**Jinnan Gong et al.**

*Correspondence to:* Eeva-Stiina Tuittila ([eeva-stiina.tuittila@uef.fi](mailto:eeva-stiina.tuittila@uef.fi))

- [bg-17-5693-2020-supplement-title-page.pdf](#)
- [Figure\\_B1.jpeg](#)
- [Figure\\_B2.png](#)
- [Figure\\_B3.png](#)
- [Figure\\_C1.png](#)
- [Figure\\_D1.png](#)

The copyright of individual parts of the supplement might differ from the CC BY 4.0 License.
